# Supplementary material
Source: MDPI journal article supplement (https://www.mdpi.com/1424-2818/14/11/947)

## Supplementary material

### Genomic analysis of a novel heavy metal resistant isolate from a Black sea contaminated sediment with the potential to degrade alkanes: *Plantactinospora alkalitolerans* sp. nov.

Lorena Carro<sup>1</sup>, Aysel Veyisoglu<sup>2</sup>, Kiymet Guven<sup>3</sup>, Peter Schumann<sup>4</sup>, Hans-Peter Klenk<sup>5</sup>, Nevzat Sahin<sup>6</sup>

<sup>1</sup>Departamento de Microbiología y Genética, Facultad de CC Agrarias y Ambientales, Universidad de Salamanca, Plaza Doctores de la Reina, 37007 Salamanca, Spain

<sup>2</sup>Department of Medical Services and Techniques, Vocational School of Health Services, Sinop University, Sinop 57000, Turkey

<sup>3</sup>Eskisehir Technical University, Faculty of Science, Biology Department, Eskisehir 26470, Turkey

<sup>4</sup>Leibniz Institute DSMZ – German Collection of Microorganisms and Cell Cultures, Inhoffenstraße 7B, 38124 Braunschweig, Germany

<sup>5</sup>School of Natural and Environmental Sciences, Newcastle University, Ridley Building, Newcastle upon Tyne NE1 7RU, UK

<sup>6</sup>Department of Molecular Biology and Genetics, Faculty of Science, Ondokuz Mayıs University, Samsun 55139, Turkey

#### Corresponding author

Lorena Carro lcg@usal.es and Nevzat Sahin nsahin@omu.edu.tr

**Table S1** dDDH values of strain S1510<sup>T</sup> and type strains used in the phylogenomic reconstruction of *Plantactinospora* and *Micromonospora* genera. Values in brackets indicate the confidence intervals obtained using formula d4 in TYGS server (equivalent to GGDC formula 2)

|                                                | S1510 <sup>T</sup> |               |
|------------------------------------------------|--------------------|---------------|
| <i>P. soya</i> DSM 46832 <sup>T</sup>          | 41.1               | [38.7 - 43.7] |
| <i>P. veratri</i> CGMCC 4.7143 <sup>T</sup>    | 35.8               | [33.3 - 38.3] |
| <i>P. mayteni</i> NBRC 109088 <sup>T</sup>     | 28.9               | [25.7 - 32.7] |
| <i>P. endophytica</i> NBRC 110450 <sup>T</sup> | 28.6               | [27.1 - 34.1] |
| <i>M. cremea</i> DSM 45599 <sup>T</sup>        | 23.3               | [21.0 - 25.8] |
| <i>M. pallida</i> DSM 43817 <sup>T</sup>       | 23.0               | [20.7 - 25.4] |
| <i>M. viridifaciens</i> DSM 43909 <sup>T</sup> | 23.0               | [20.7 - 25.5] |
| <i>M. chalcea</i> DSM 43026 <sup>T</sup>       | 22.6               | [20.3 - 25.0] |
| <i>M. nigra</i> DSM 43818 <sup>T</sup>         | 22.5               | [20.3 - 25.0] |

**Table S2** Differential characteristics of strain *Plantactinospora* sp. S1510<sup>T</sup> and close related type strains. \*Data from Guo et al. 2016 [43] and Li et al. 2018 [44]. +: positive; -: negative; DPG: diphosphatidylglycerol; PE: phosphatidylethanolamine; PEM: phosphatidylmethylethanolamine; PG: phosphatidylglycerol; PI: phosphatidylinositol; PIM: phosphatidylinositol mannoside; MK: menaquinone.

| Characteristics                            | <i>Plantactinospora</i> sp. S1510 <sup>T</sup>                                                                                        | <i>Plantactinospora soyae</i> NEAU-gxj3 <sup>T</sup> *                                                                | <i>Plantactinospora solaniradicis</i> NEAU-FJL1 <sup>T</sup> *                                                                        |
|--------------------------------------------|---------------------------------------------------------------------------------------------------------------------------------------|-----------------------------------------------------------------------------------------------------------------------|---------------------------------------------------------------------------------------------------------------------------------------|
| Colony colour on ISP 2                     | Brilliant Orange                                                                                                                      | Strong Orange Yellow                                                                                                  | Light Orange Yellow                                                                                                                   |
| Colony colour on ISP 3                     | Light Orange                                                                                                                          | Light yellow to pale greenish yellow                                                                                  | Brilliant Orange Yellow                                                                                                               |
| Colony colour on ISP 6                     | Light Salmon                                                                                                                          | Light Orange Yellow                                                                                                   | Moderate Orange Yellow                                                                                                                |
| <b>pH tolerance</b>                        |                                                                                                                                       |                                                                                                                       |                                                                                                                                       |
| 5                                          | -                                                                                                                                     | -                                                                                                                     | +                                                                                                                                     |
| 6                                          | -                                                                                                                                     | +                                                                                                                     | +                                                                                                                                     |
| 10                                         | +                                                                                                                                     | +                                                                                                                     | -                                                                                                                                     |
| 11                                         | +                                                                                                                                     | -                                                                                                                     | -                                                                                                                                     |
| <b>Temperature (°C)</b>                    |                                                                                                                                       |                                                                                                                       |                                                                                                                                       |
| 20                                         | -                                                                                                                                     | +                                                                                                                     | +                                                                                                                                     |
| 28                                         | +                                                                                                                                     | +                                                                                                                     | +                                                                                                                                     |
| 37                                         | -                                                                                                                                     | -                                                                                                                     | +                                                                                                                                     |
| 40                                         | -                                                                                                                                     | -                                                                                                                     | +                                                                                                                                     |
| <b>Degradation of (% w/v)</b>              |                                                                                                                                       |                                                                                                                       |                                                                                                                                       |
| Starch (1 %)                               | +                                                                                                                                     | -                                                                                                                     | +                                                                                                                                     |
| Urea Hydrolysis                            | -                                                                                                                                     | +                                                                                                                     | -                                                                                                                                     |
| Cellulose                                  | +                                                                                                                                     | +                                                                                                                     | -                                                                                                                                     |
| <b>Utilisation as sole carbon source</b>   |                                                                                                                                       |                                                                                                                       |                                                                                                                                       |
| L-arabinose                                | +                                                                                                                                     | -                                                                                                                     | +                                                                                                                                     |
| D-fructose                                 | +                                                                                                                                     | -                                                                                                                     | +                                                                                                                                     |
| D-mannitol                                 | -                                                                                                                                     | +                                                                                                                     | -                                                                                                                                     |
| <i>myo</i> -inositol                       | -                                                                                                                                     | +                                                                                                                     | -                                                                                                                                     |
| D-sorbitol                                 | -                                                                                                                                     | +                                                                                                                     | +                                                                                                                                     |
| Sucrose                                    | +                                                                                                                                     | -                                                                                                                     | +                                                                                                                                     |
| <b>Utilisation as sole nitrogen source</b> |                                                                                                                                       |                                                                                                                       |                                                                                                                                       |
| L-threonine                                | -                                                                                                                                     | +                                                                                                                     | +                                                                                                                                     |
| L-tyrosine                                 | -                                                                                                                                     | +                                                                                                                     | -                                                                                                                                     |
| <b>Whole-cell sugars</b>                   | glucose, mannose, ribose, xylose                                                                                                      | galactose, glucose, xylose                                                                                            | arabinose, galactose, glucose, xylose                                                                                                 |
| <b>Polar lipids</b>                        | DPG, PE, PI, PEM, PG                                                                                                                  | DPG, PI, PIM, PE                                                                                                      | DPG, PI, PE                                                                                                                           |
| <b>Major fatty acids (&gt; 10%)</b>        | <i>iso</i> -C <sub>15:0</sub> , <i>anteiso</i> -C <sub>15:0</sub> , <i>iso</i> -C <sub>16:0</sub> , <i>anteiso</i> -C <sub>17:0</sub> | <i>anteiso</i> -C <sub>17:0</sub> , <i>iso</i> -C <sub>16:0</sub> , <i>iso</i> -C <sub>15:0</sub> , C <sub>15:0</sub> | C <sub>15:0</sub> , <i>iso</i> -C <sub>16:0</sub> , <i>iso</i> -C <sub>17:0</sub> , C <sub>17:0</sub> , <i>iso</i> -C <sub>15:0</sub> |
| <b>Predominant menaquinones (&gt; 10%)</b> | MK-10(H <sub>6</sub> ), MK-10(H <sub>8</sub> )                                                                                        | MK-10(H <sub>6</sub> ), MK-9(H <sub>8</sub> ), MK-10(H <sub>2</sub> ), MK-10(H <sub>4</sub> )                         | MK-10(H <sub>6</sub> ), MK-10(H <sub>4</sub> )                                                                                        |
| <b>DNA G+C content (mol%)</b>              | 70.5                                                                                                                                  | 70.3                                                                                                                  | 69.5                                                                                                                                  |

**Table S3** Fatty acids profile of strain S1510<sup>T</sup>

| Fatty acids                        | S1510 <sup>T</sup> |
|------------------------------------|--------------------|
| <b>Saturated</b>                   |                    |
| C <sub>15:0</sub>                  | 2.2                |
| C <sub>16:0</sub>                  | 1.1                |
| C <sub>17:0</sub>                  | 9.5                |
| C <sub>18:0</sub>                  | 1.2                |
| C <sub>19:0</sub>                  | 0.8                |
| <b>Unsaturated</b>                 |                    |
| C <sub>17:1</sub> <i>cis</i> 9     | 7.2                |
| C <sub>18:1</sub> <i>cis</i> 9     | 2.5                |
| <b>Branched</b>                    |                    |
| <i>iso</i> C <sub>14:0</sub>       | 1.3                |
| <i>iso</i> C <sub>15:0</sub>       | 22.6               |
| <i>iso</i> C <sub>15:1</sub> G     | 1.5                |
| <i>iso</i> C <sub>16:0</sub>       | 13.1               |
| <i>iso</i> C <sub>16:1</sub> G     | 2.4                |
| <i>iso</i> C <sub>17:0</sub>       | 2.7                |
| <i>iso</i> C <sub>18:0</sub>       | 0.4                |
| <i>anteiso</i> C <sub>15:0</sub>   | 14.4               |
| <i>anteiso</i> C <sub>17:0</sub>   | 10.0               |
| <i>anteiso</i> C <sub>15:1</sub> A | 0.4                |
| <i>anteiso</i> C <sub>17:1</sub> A | 1.1                |
| <b>Hydroxi</b>                     |                    |
| C <sub>16:1</sub> 2OH              | 4.4                |

**Table S4** Biosynthetic gene clusters detected with antiSMASH 5.1.2 tool for strain S1510<sup>T</sup>

|            |                   | Similarity                                                                    | %      | Nucleotides | Location |               |
|------------|-------------------|-------------------------------------------------------------------------------|--------|-------------|----------|---------------|
| Type       |                   |                                                                               |        |             | Contig   | Position      |
| Cluster 1  | NRPS-like         | bicornutin A1, rhizomide A, anabaenopeptin NZ857, xenotetrapeptide, luminmide | 100    | 1272        | 493      | 1 - 1272      |
| Cluster 2  | NRPS              | -                                                                             | -      | 6010        | 358      | 1 - 6010      |
| Cluster 3  | Terpene           | isorenieratene, carotenoid                                                    | 28, 25 | 20990       | 10       | 41207 - 62196 |
| Cluster 4  | Terpene           | phosphonoglycans, amycolamycin A                                              | 3, 2   | 17398       | 102      | 12506 - 29903 |
| Cluster 5  | NRPS/Bacteriocin  | -                                                                             | -      | 53779       | 21       | 2905 - 56683  |
| Cluster 6  | NRPS              | JBIR-78, feglymycin                                                           | 44,31  | 24990       | 137      | 1 - 24990     |
| Cluster 7  | NRPS              | -                                                                             | -      | 28816       | 109      | 1 - 28816     |
| Cluster 8  | NRPS/T3PKS        | kistamicin A                                                                  | 40     | 53344       | 28       | 1 - 53344     |
| Cluster 9  | Terpene           | -                                                                             | -      | 10611       | 33       | 38262 - 48872 |
| Cluster 10 | NRPS              | -                                                                             | -      | 26814       | 7        | 1 - 26814     |
| Cluster 11 | Other/phosphonate | phosphinothricintripeptide                                                    | 34     | 40969       | 7        | 38506 - 79474 |
| Cluster 12 | Bacteriocin       | hygromycin A, apramycin, lividomycin                                          | 6      | 10816       | 138      | 9780 - 20595  |
| Cluster 13 | Lasso peptide     | -                                                                             | -      | 14615       | 96       | 1 - 14615     |
| Cluster 14 | NRPS              | -                                                                             | -      | 1843        | 468      | 1 - 1843      |
| Cluster 15 | T1PKS             | hygrocine A, hygrocine B                                                      | 9      | 16624       | 215      | 1 - 16624     |
| Cluster 16 | Bacteriocin       | lymphostin, neolymphostinol B, lymphostinol, neolymphostinol B                | 33     | 10822       | 6        | 39763 - 50584 |
| Cluster 17 | NRPS-like         | -                                                                             | -      | 32841       | 15       | 32649 - 65489 |
| Cluster 18 | Siderophore       | scabichelin                                                                   | 20     | 13310       | 1        | 3861 - 17170  |
| Cluster 19 | NRPS/PKS-like     | kistamicin A, feglymycin                                                      | 32, 31 | 33771       | 81       | 1 - 33771     |
| Cluster 20 | Indole            | fortimycin                                                                    | 11     | 14230       | 177      | 5429 - 19658  |
| Cluster 21 | NRPS              | -                                                                             | -      | 35834       | 26       | 1 - 35834     |
| Cluster 22 | Ladderane         | MS-271, aborycin                                                              | 14     | 31574       | 60       | 8377 - 39950  |
| Cluster 23 | T3PKS             | alkyl-O-dihydrogeranyl-methoxyhydroquinones                                   | 71     | 29483       | 74       | 1 - 29483     |
| Cluster 24 | NRPS/T1PKS        | buryrolactol A                                                                | 46     | 41135       | 56       | 1 - 41135     |
| Cluster 25 | Lanthipeptide     | -                                                                             | -      | 18093       | 18       | 43345 - 61437 |
| Cluster 26 | T2PKS             | frankiamicin                                                                  | 28     | 42270       | 8        | 1 - 42270     |
| Cluster 27 | Terpene           | hopene                                                                        | 38     | 12352       | 253      | 1 - 12352     |
| Cluster 28 | NRPS              | -                                                                             | -      | 12238       | 254      | 1 - 12238     |
| Cluster 29 | NRPS              | -                                                                             | -      | 10418       | 283      | 1 - 10418     |
| Cluster 30 | Tfua-related      | thiovarsolin a, b, c, d                                                       | 33     | 22024       | 32       | 28410 - 50433 |
| Cluster 31 | NRPS              | -                                                                             | -      | 5419        | 369      | 1 - 5419      |
| Cluster 32 | NRPS              | -                                                                             | -      | 5096        | 377      | 1 - 5096      |
| Cluster 33 | NRPS              | -                                                                             | -      | 3544        | 414      | 1 - 3544      |
| Cluster 34 | NRPS              | sarpeptin A, B                                                                | 25     | 4381        | 389      | 1 - 4381      |
| Cluster 35 | NRPS              | -                                                                             | -      | 2325        | 448      | 1 - 2325      |
| Cluster 36 | NRPS              | -                                                                             | -      | 3144        | 422      | 1 - 3144      |
| Cluster 37 | NRPS              | -                                                                             | -      | 2172        | 455      | 1 - 2172      |

**Table S5** Capacity of S1510<sup>T</sup> to grow in the presence of several concentrations of different metals after 14 days on M65 medium. + good growth (similar to the positive control); w weak growth; - no growth

|    | 1 ppm | 10 ppm | 100 ppm | 300 ppm | 500 ppm | 1000 ppm | 2000 ppm | 5000 ppm |
|----|-------|--------|---------|---------|---------|----------|----------|----------|
| Cd | +     | w      | -       | -       | -       | -        | -        | -        |
| Co | +     | +      | w       | -       | -       | -        | -        | -        |
| Cr | +     | +      | +       | +       | -       | -        | -        | -        |
| Cu | +     | +      | +       | +       | +       | +        | +        | -        |
| Hg | w     | -      | -       | -       | -       | -        | -        | -        |
| Pb | +     | +      | +       | +       | +       | +        | +        | -        |
| Zn | +     | +      | +       | +       | +       | +        | +        | w        |

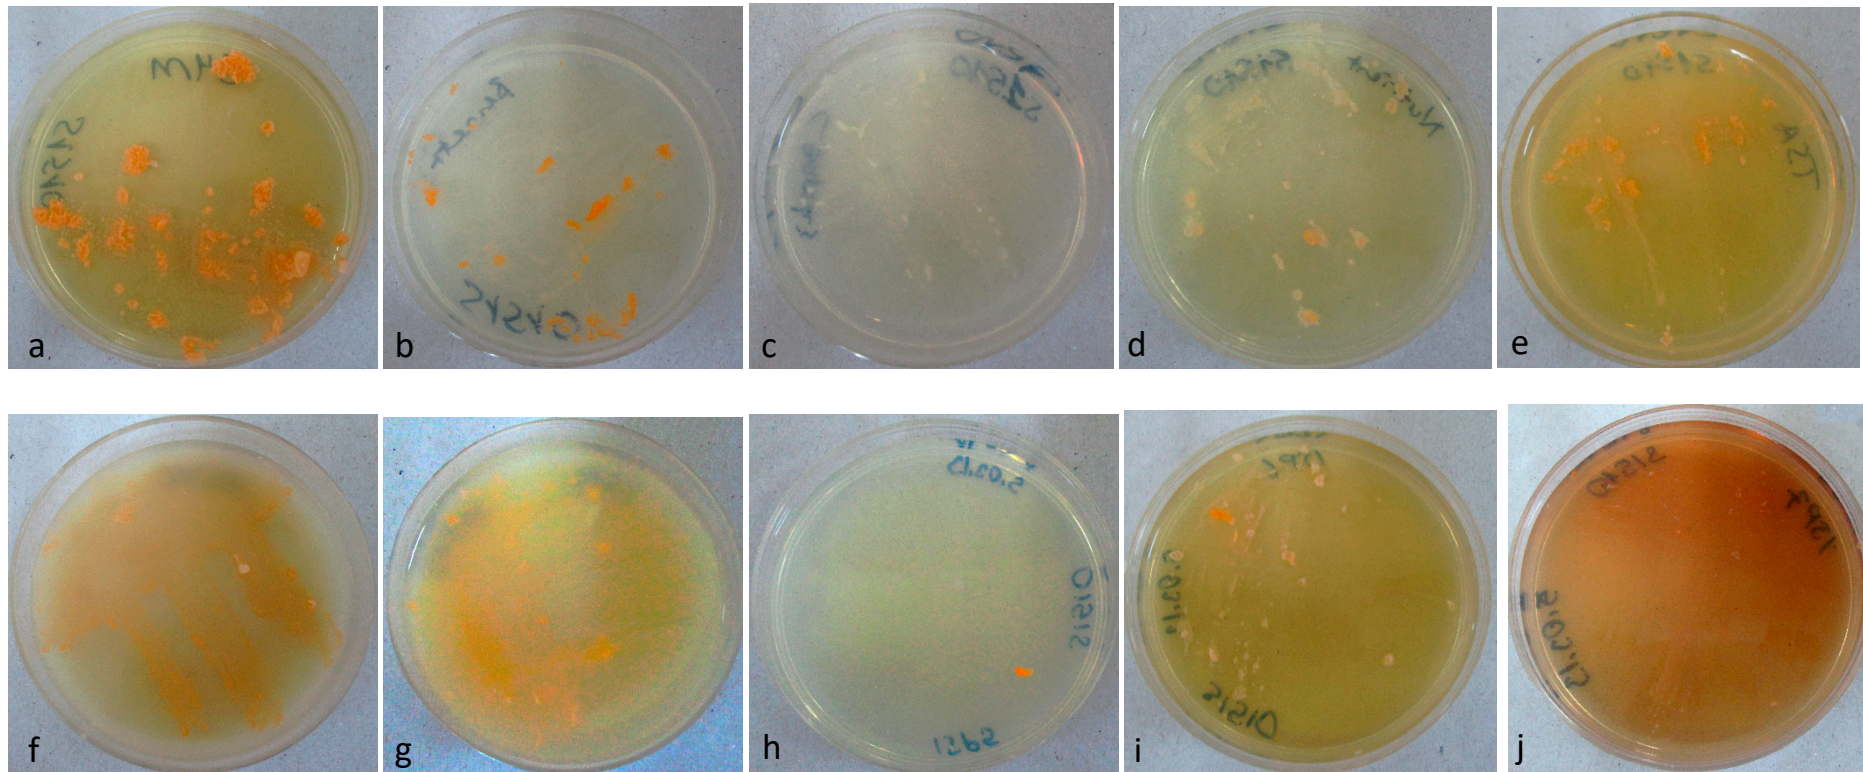

**Figure S1** Cultural characteristics of the strain S1510<sup>T</sup> after growth on different media. (a) ISP 2 agar; (b) Bennett's agar; (c) Czapek's agar; (d) Nutrient agar; (e) TSA agar; (f) ISP 3 agar; (g) ISP 4 agar; (h) ISP 5 agar; (i) ISP 6 agar; (j) ISP 7 agar.

**Figure S2** Polar lipid profile of strain S1510<sup>T</sup> after spraying with molybdatophosphoric acid. DPG: diphosphatidylglycerol; PE: phosphatidylethanolamine; PEM: phosphatidylmehtylethanolamine; PG: phosphatidylglycerol; PI: phosphatidylinositol

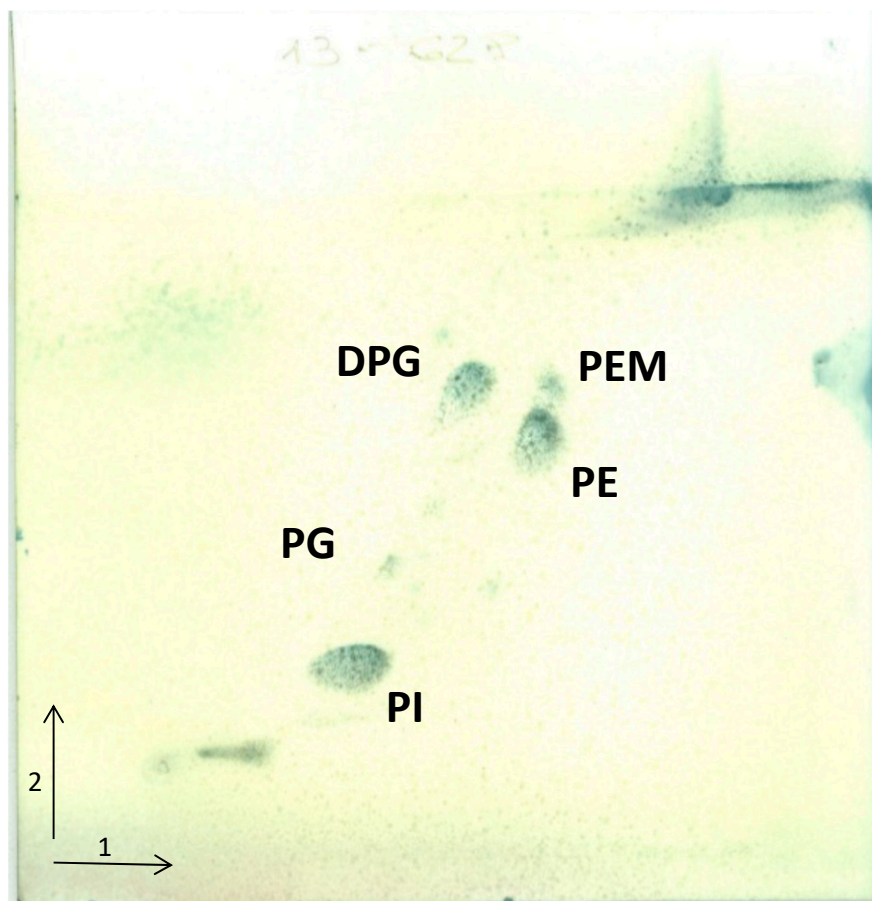

Supplement: s1 [file s1]
